# Supplementary material
Source: PubMed Central journal article supplement (PMC1224671)

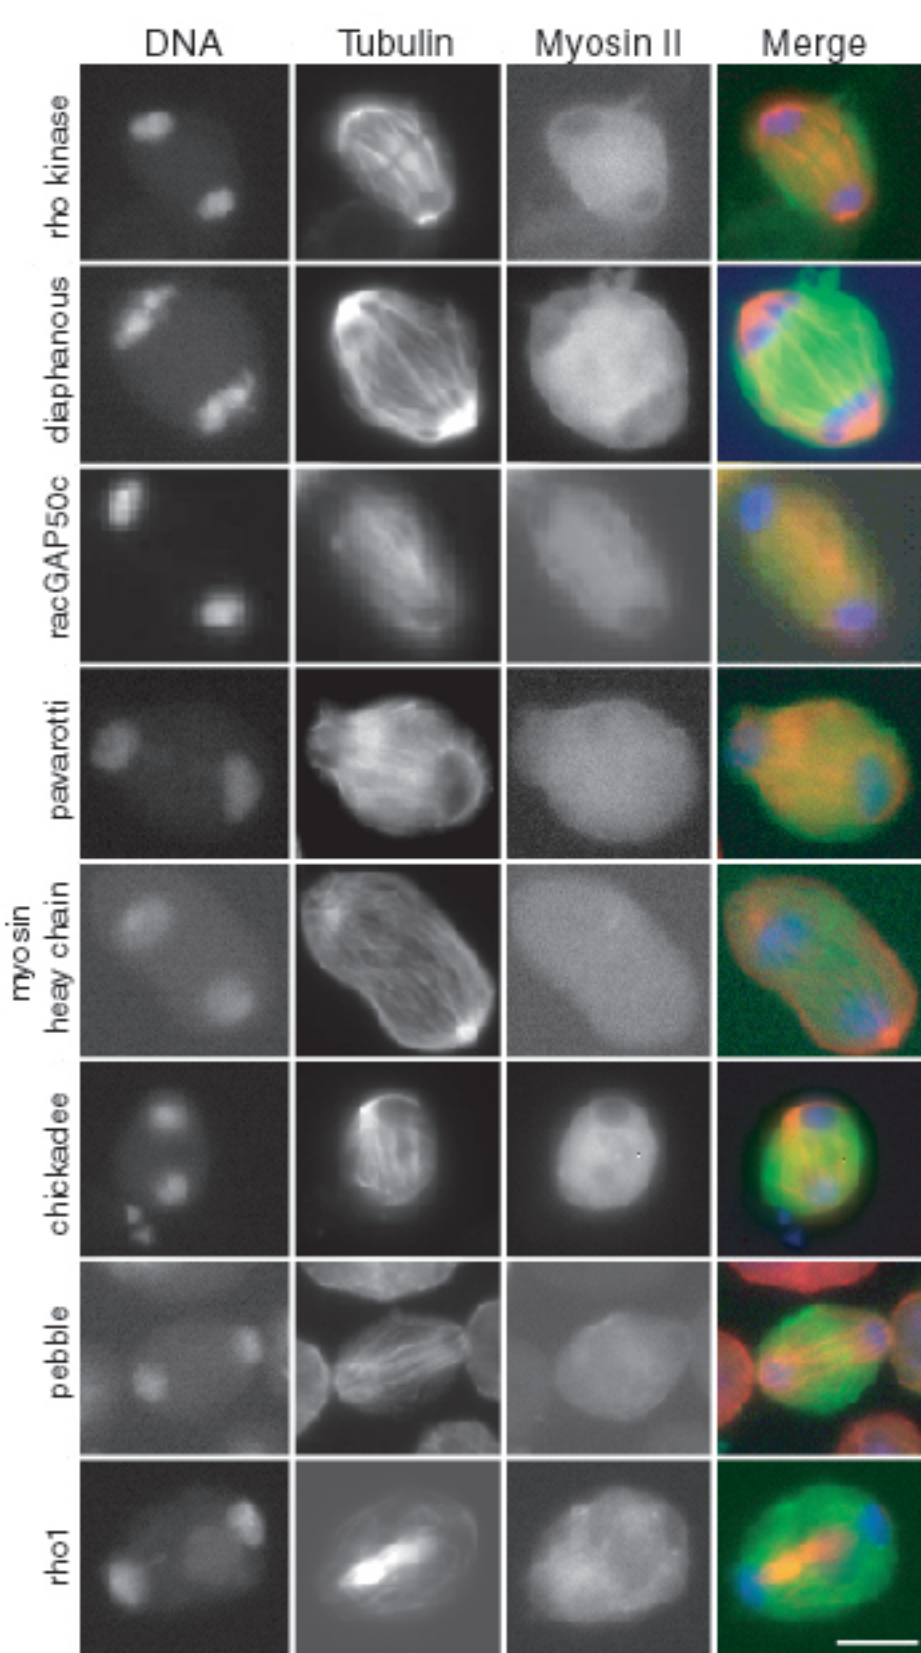

Supplement: pnas_0506810102_1.pdf [file pnas_0506810102_1.pdf]
